# Supplementary material for: Pathogenic BCL11A variants provide insights into the mechanisms of human fetal hemoglobin silencing
Source: PLoS Genet. 2021 Oct 11;17(10):e1009835. doi: 10.1371/journal.pgen.1009835 (PMC8530301; doi:10.1371/journal.pgen.1009835)
Supplement: S2 Table — (XLSX) [file pgen.1009835.s005.xlsx]

## Sheet:  Supplementary_x000a_Table 2
Antibodies	Source	Catalog number
Mouse monoclonal to BCL11A [14B5]	Abcam	Cat#ab19487
Rabbit polyclonal to HA tag - ChIP Grade	Abcam	Cat#ab9110
Anti-LMNB1 Antibody [B-10]	Santa Cruz	Cat#sc-374015
Mouse monoclonal to GAPDH [6C5]	Santa Cruz	Cat#sc-32233
FITC anti-human CD49d [9F10]	BioLegend	Cat#304315
APC anti-human CD235a [HIR2]	Thermo Fisher Scientific	Cat#17-9987-42
PE anti-human CD71 [OKT9]	eBioscience	Cat#12-0719-42
Human Fetal Hemoglobin APC Conjugate	Thermo Fisher Scientific	Cat#MHFH05
Goat Anti-Rabbit IgG (H + L)-HRP Conjugate	BioRad	Cat#1706515
Goat anti Mouse IgG (H/L):HRP	BioRad	Cat#STAR207P
Normal Rabbit IgG	Santa Cruz	Cat#sc-2027
IRDye® 680RD Donkey anti-Mouse IgG Secondary Antibody	LI-COR	Cat#926-68072
IRDye® 680RD Donkey anti-Rabbit IgG Secondary Antibody	LI-COR	Cat#926-68073
